# Supplementary material
Source: MDPI journal article supplement (https://www.mdpi.com/2073-4352/13/9/1393)
Supplement: s1 [file s1 › crystals-2592037-supplementary.pdf]

Supplementary File

# Development of Cerium Oxide/Chitosan/Graphene Oxide Nanocomposite: An Investigation towards Its Biological Applications under In Vitro Conditions

Saranya J.<sup>1,\*</sup>, Preethi S.<sup>1</sup>, Mohammed Rafi Shaik<sup>2,\*</sup>, Merajuddin Khan<sup>2</sup>, Mujeeb Khan<sup>2</sup>, and Baji Shaik<sup>3</sup>

<sup>1</sup> Department of Electronics and Communication Engineering, Rajalakshmi Engineering College, Thandalam, Tamil Nadu 602 105, India; 210811001@rajalakshmi.edu.in

<sup>2</sup> Department of Chemistry, College of Science, King Saud University, P.O. Box 2455, Riyadh 11451, Saudi Arabia; mkhan3@ksu.edu.sa (M.K.); kmujeeb@ksu.edu.sa (M.K.)

<sup>3</sup> School of Chemical Engineering, Yeungnam University, Gyeongsan 38541, Republic of Korea; shaikbaji@yu.ac.kr

\* Correspondence: saranya.j@rajalakshmi.edu.in (S.J.); mrshaik@ksu.edu.sa (M.R.S.)

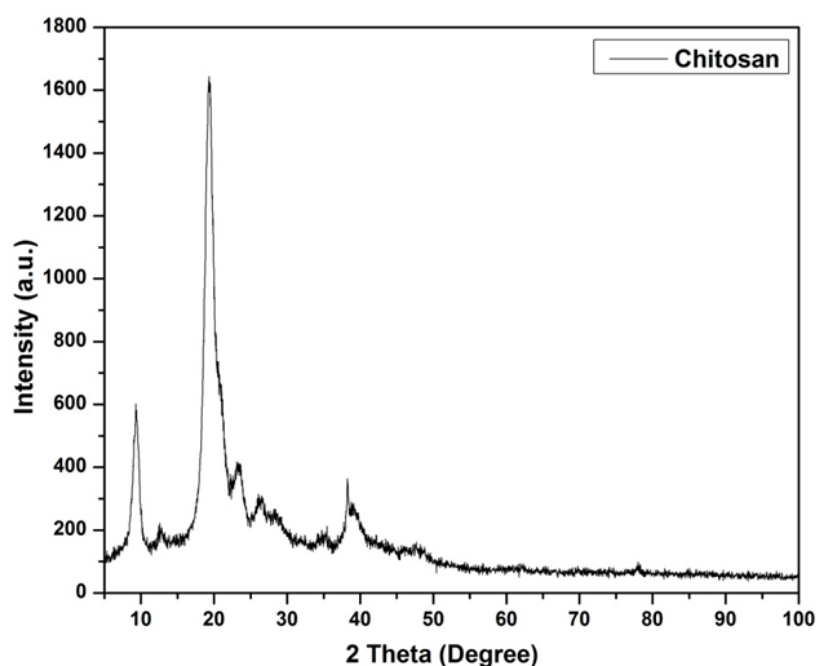

Figure S1: XRD analysis of Chitosan.

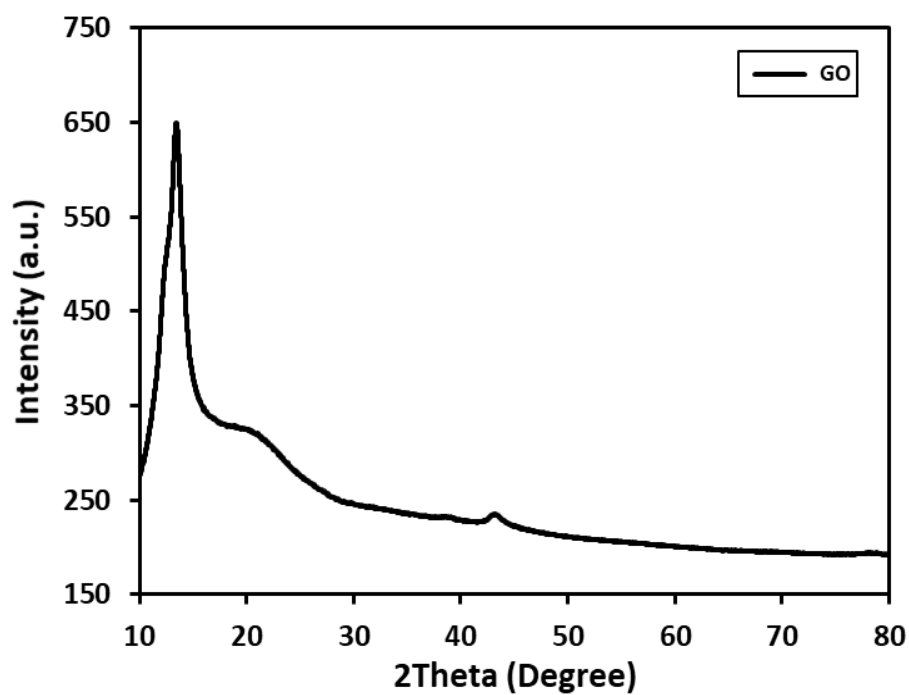

Figure S2: XRD analysis of GO.

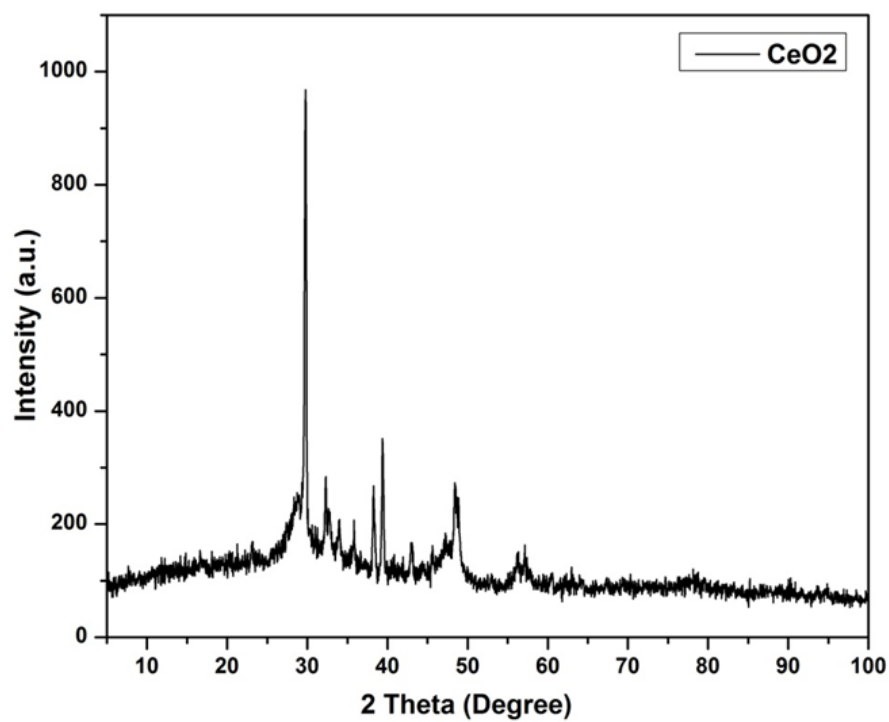

Figure S3: XRD analysis of CeO<sub>2</sub>.

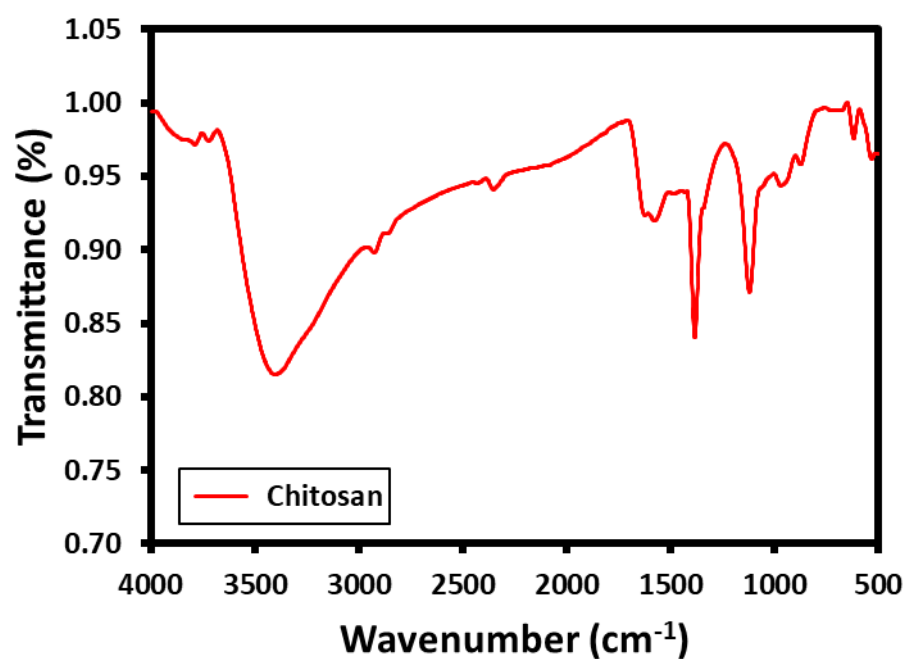

Figure S4: FT-IR analysis of Chitosan.

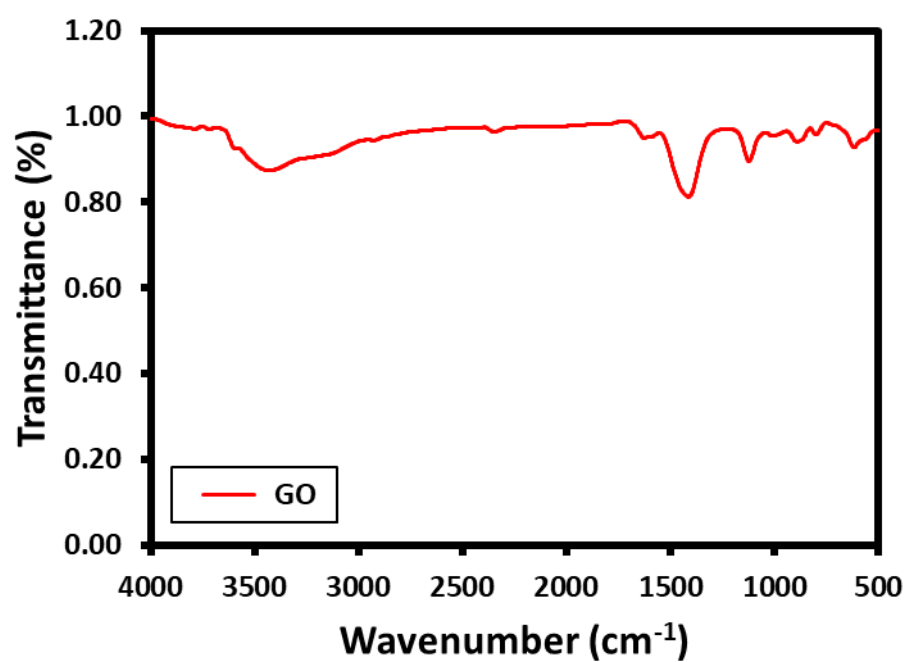

Figure S5: FT-IR analysis of GO.

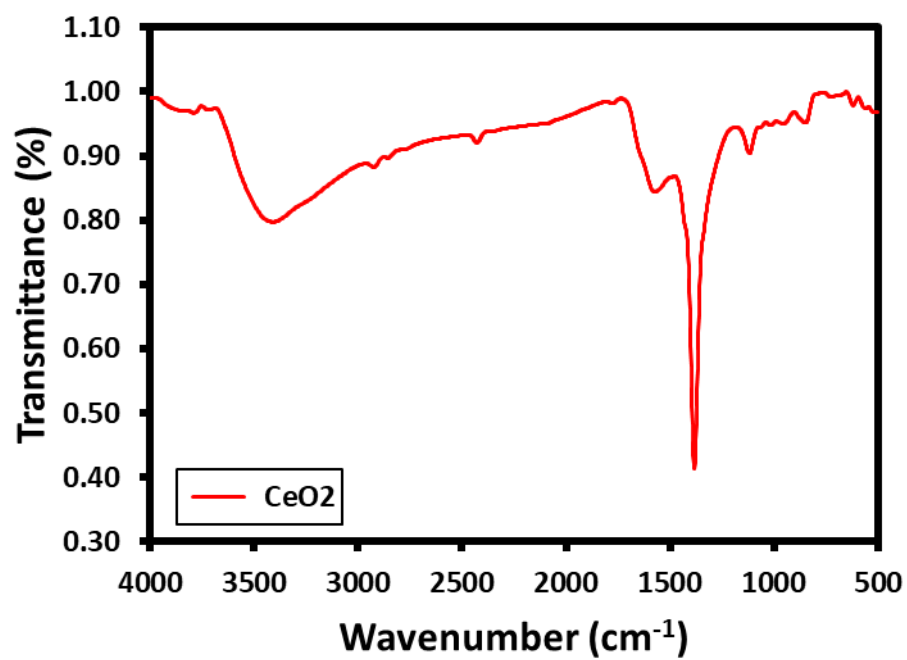

Figure S6: FT-IR analysis of CeO<sub>2</sub>.

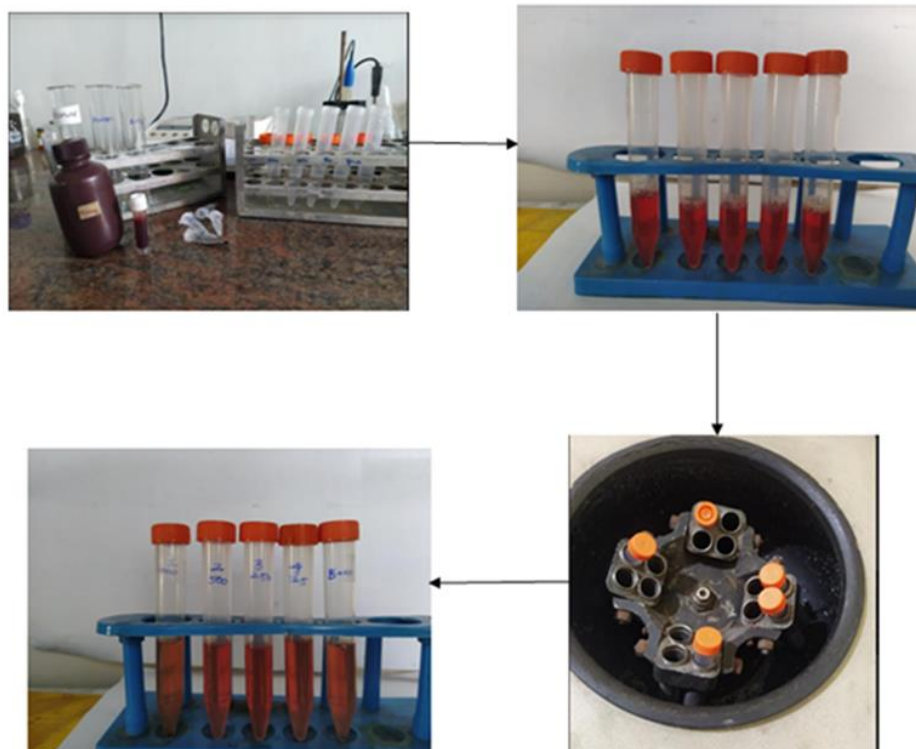

Figure S7. Hemolysis assay using the CeO<sub>2</sub>/CS/GO ternary nanocomposite.

**Table S1:** Elemental composition of the CeO<sub>2</sub>/CS/GO ternary nanocomposite.

| Spectrum 4 |           |        |           |          |
|------------|-----------|--------|-----------|----------|
| Element    | Line Type | Wt%    | Wt% Sigma | Atomic % |
| C          | K series  | 8.68   | 2.59      | 17.63    |
| O          | K series  | 36.61  | 1.29      | 55.86    |
| Na         | K series  | 10.57  | 0.54      | 11.22    |
| S          | K series  | 12.20  | 0.50      | 9.29     |
| K          | K series  | 0.96   | 0.15      | 0.60     |
| Ce         | L series  | 30.99  | 1.12      | 5.40     |
| Total:     |           | 100.00 |           | 100.00   |

**Table S2:** Hemolysis assay response upon interaction of CeO<sub>2</sub>/CS/GO ternary nanocomposite with HRBCs.

| CeO <sub>2</sub> /CS/GO ternary nanocomposite | UV for human red blood cells (HRBC) |
|-----------------------------------------------|-------------------------------------|
| 1000 µg/disc                                  | 0.5                                 |
| 500 µg/disc                                   | 0.696                               |
| 250 µg/disc                                   | 0.711                               |
| 125 µg/disc                                   | 0.622                               |
| Blank                                         | 0.622                               |
